# Supplementary material for: Genomic and Biotechnological Characterization of the Heavy-Metal Resistant, Arsenic-Oxidizing Bacterium Ensifer sp. M14
Source: MDPI journal article supplement (doi:10.3390/genes9080379), 2018-07-27
Supplement: s1 [file s1]

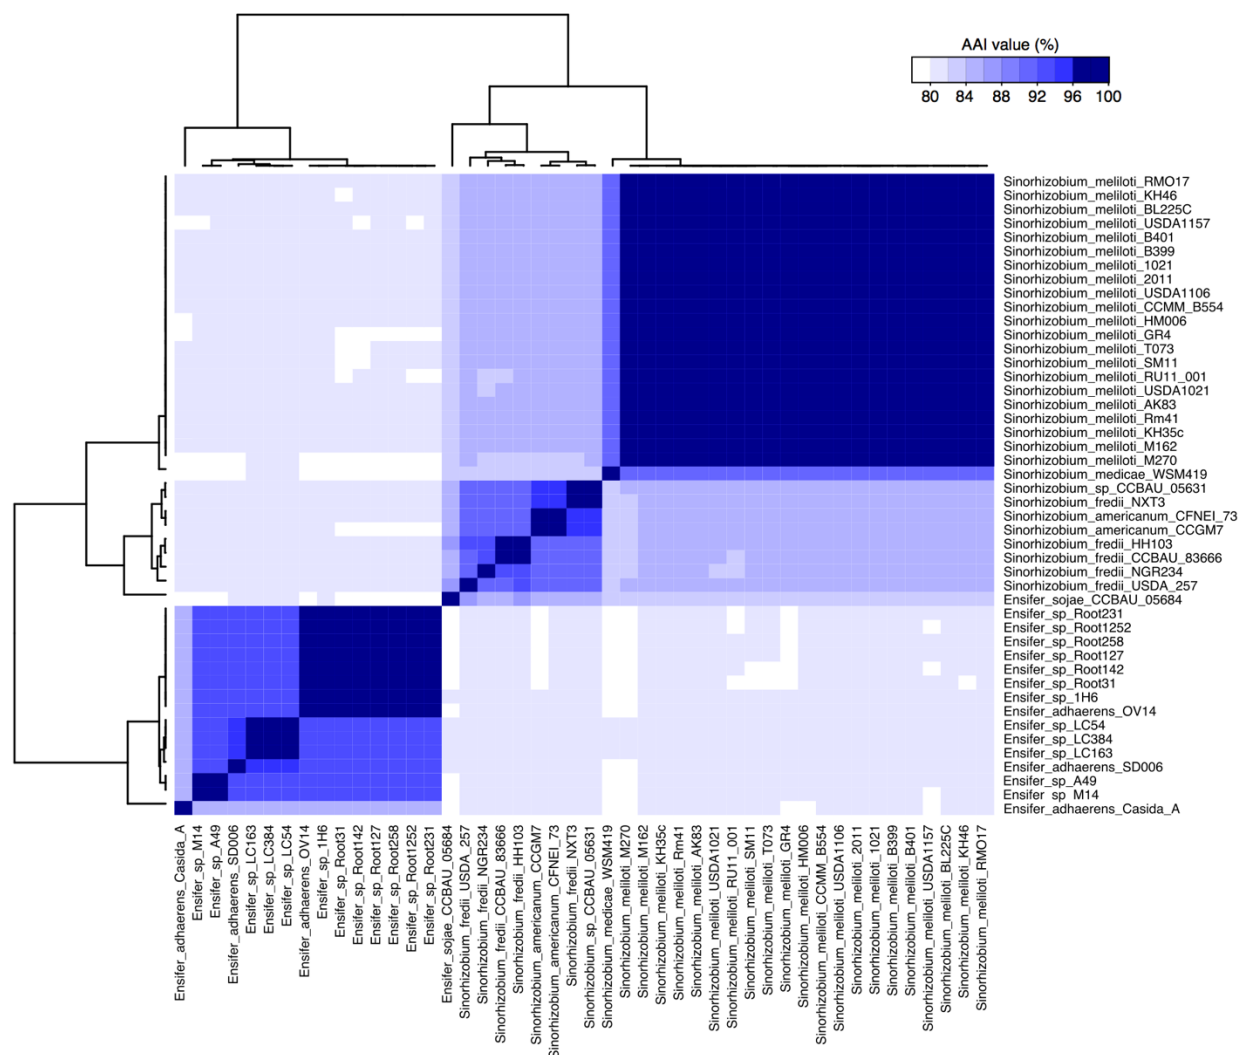

**Figure S2: Average amino acid identity matrix.** A matrix of the two-way AAI values for 46 *Sinorhizobium/Ensifer* strains is shown. Clustering was performed along both axes using hierarchical clustering with Pearson distance and average linkage.
