# Supplementary material for: Genomic and Biotechnological Characterization of the Heavy-Metal Resistant, Arsenic-Oxidizing Bacterium Ensifer sp. M14
Source: MDPI journal article supplement (doi:10.3390/genes9080379), 2018-07-27
Supplement: s1 [file s1]

**Table S3.** COG category descriptions.

| COG Category | Description                                                      |
|--------------|------------------------------------------------------------------|
| B            | Chromatin structure and dynamics                                 |
| C            | Energy production and conversion                                 |
| D            | Cell cycle control, cell division, and chromosome partitioning   |
| E            | Amino acid transport and metabolism                              |
| F            | Nucleotide transport and metabolism                              |
| G            | Carbohydrate transport and metabolism                            |
| H            | Coenzyme transport and metabolism                                |
| I            | Lipid transport and metabolism                                   |
| J            | Translation, ribosomal structure and biogenesis                  |
| K            | Transcription                                                    |
| L            | Replication, recombination, and repair                           |
| M            | Cell wall, membrane, envelope biogenesis                         |
| N            | Cell motility                                                    |
| O            | Posttranslational modification, protein turnover, and chaperones |
| P            | Inorganic ion transport and metabolism                           |
| Q            | Secondary metabolite biosynthesis, transport, and catabolism     |
| S            | Unknown function                                                 |
| Y            | Signal transduction mechanisms                                   |
| U            | Intracellular trafficking, secretion, and vesicular transport    |
| V            | Defense mechanisms                                               |
